# Supplementary material
Source: PubMed Central journal article supplement (PMC3811686)
Supplement: MCB.00021-13_zmb999100155so1.pdf [file MCB.00021-13_zmb999100155so1.pdf]

Mortalin/GRP75 (D-9)

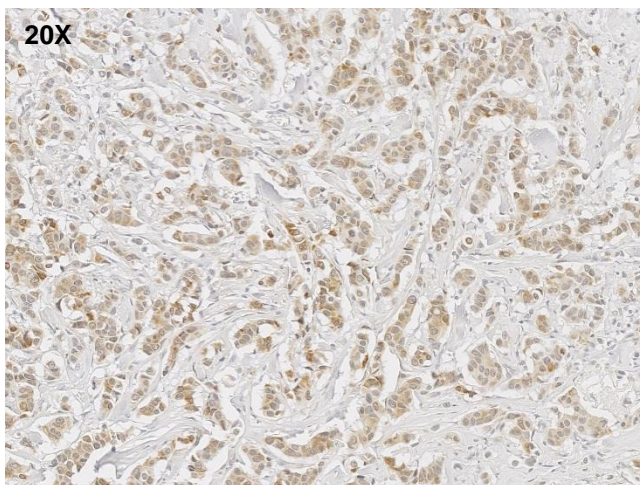

IgG<sub>2</sub>

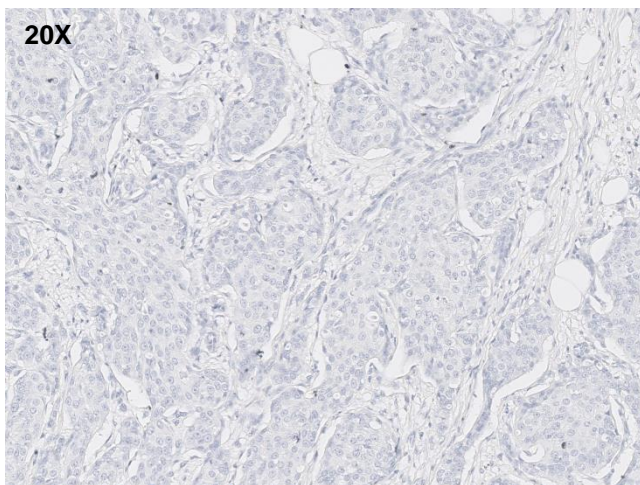

**Figure S1. Validation of mortalin antibody (D-9) for immunohistochemistry.** Mortalin antibody (D-9) and its control IgG type 2 were tested for specific recognition of mortalin in human breast cancer tissues (antibody dilution, 1:200).

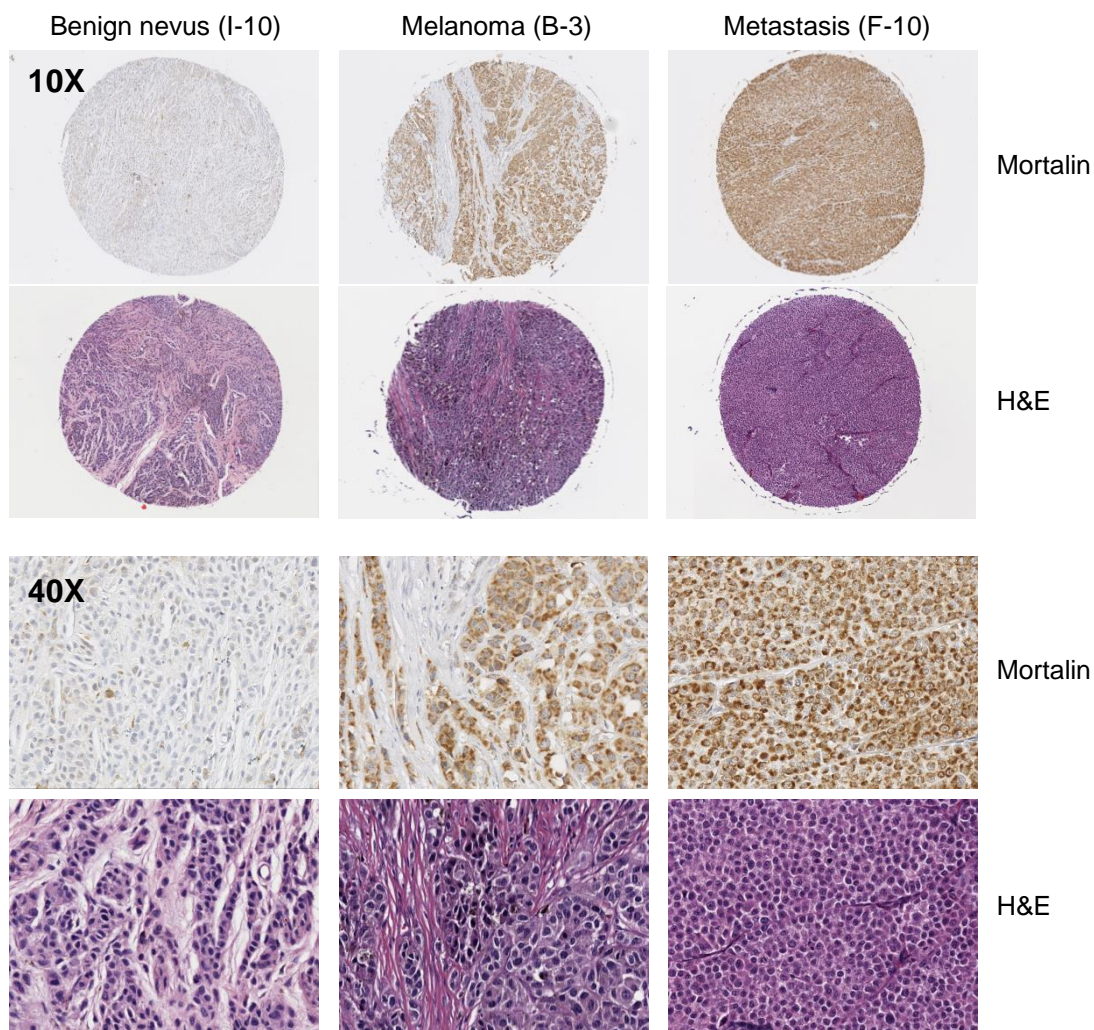

**Figure S2. H&E staining images corresponding to Fig. 2C.** Formalin-fixed, paraffin-embedded 5  $\mu$ m sections of melanoma tissue microarray (ME1004a), containing 100 cases (melanoma, 56; metastatic melanoma, 20; and nevus, 24) was purchased from US Biomax (Rockville, MD). The matching images of H&E staining were downloaded from the supplier's website (<http://www.biomax.us/tissue-arrays/Melanoma/ME1004a>). Indicated are the core numbers in the tissue array.

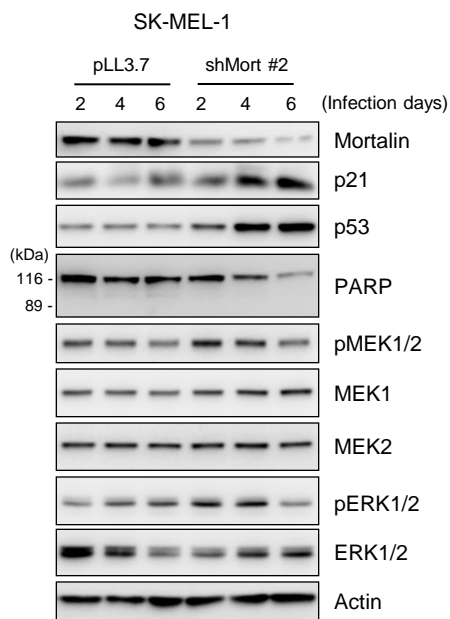

**Figure S3. Effects of shMort #2 on SK-MEL-1.** SK-MEL-1 cells were infected with the control pLL3.7 virus and shMort #2 for 5 days before Western blot analysis.

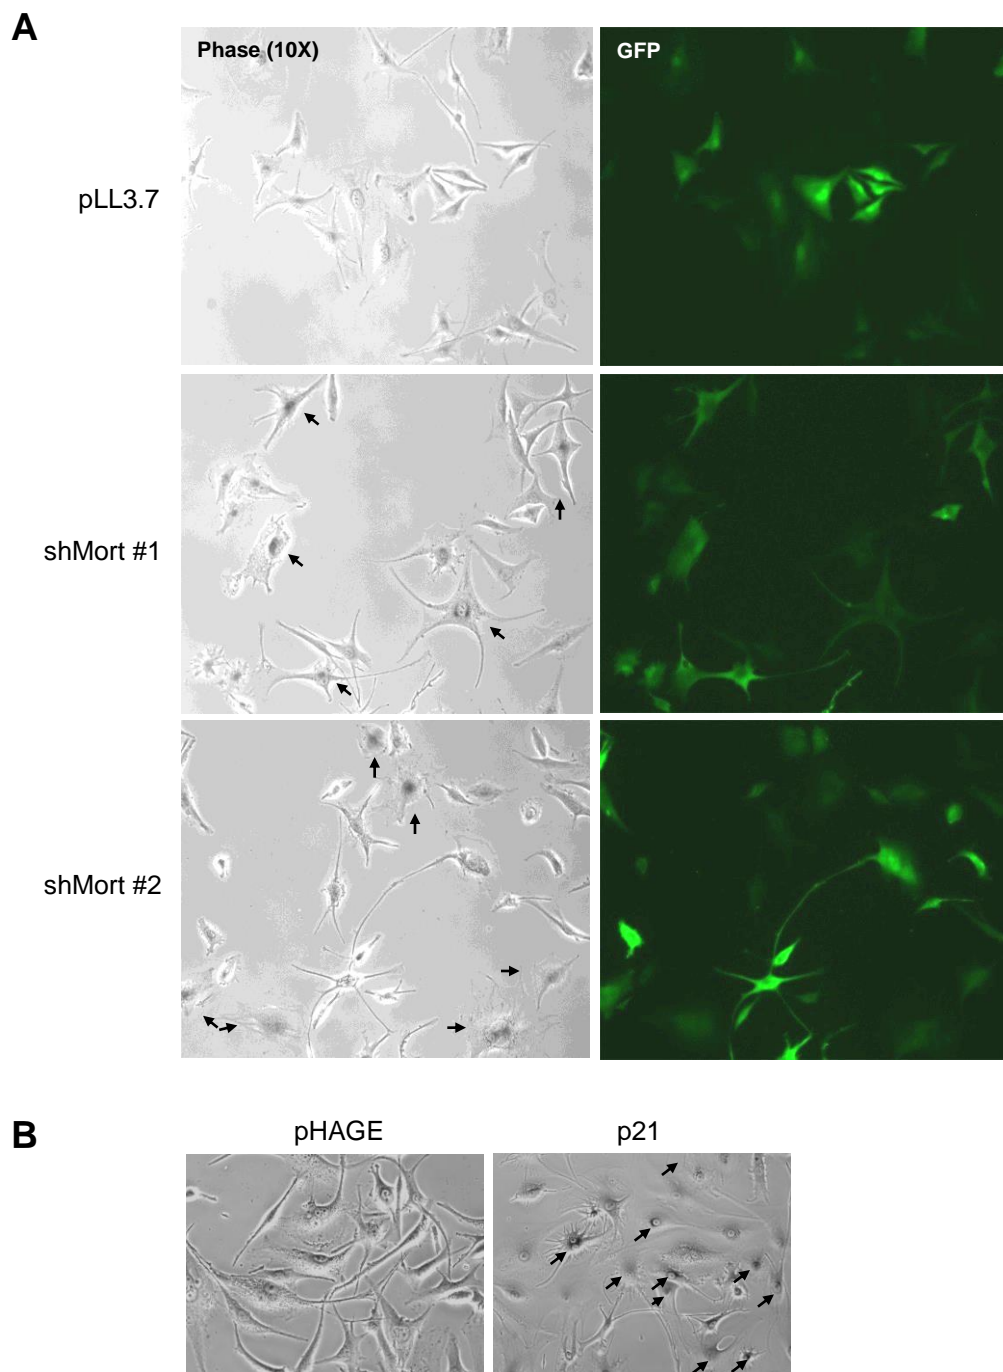

**Figure S4. Mortalin knockdown or ectopic p21<sup>CIP1</sup> expression increases SA  $\beta$ -gal staining in SK-MEL-28 culture. (A)** Cells infected with viruses expressing two different shRNAs that target mortalin mRNA (shMort #1 and shMort #2) for 10 days were examined for SA  $\beta$ -gal staining (indicated by arrows). Similar infection ratio was verified by GFP expression (right panels). The empty pLL3.7 virus-infected cells were used for comparison. **(B)** Cells infected with lentiviral pHAGE expressing p21<sup>CIP1</sup> or empty pHAGE were examined for SA  $\beta$ -gal staining at day 5.

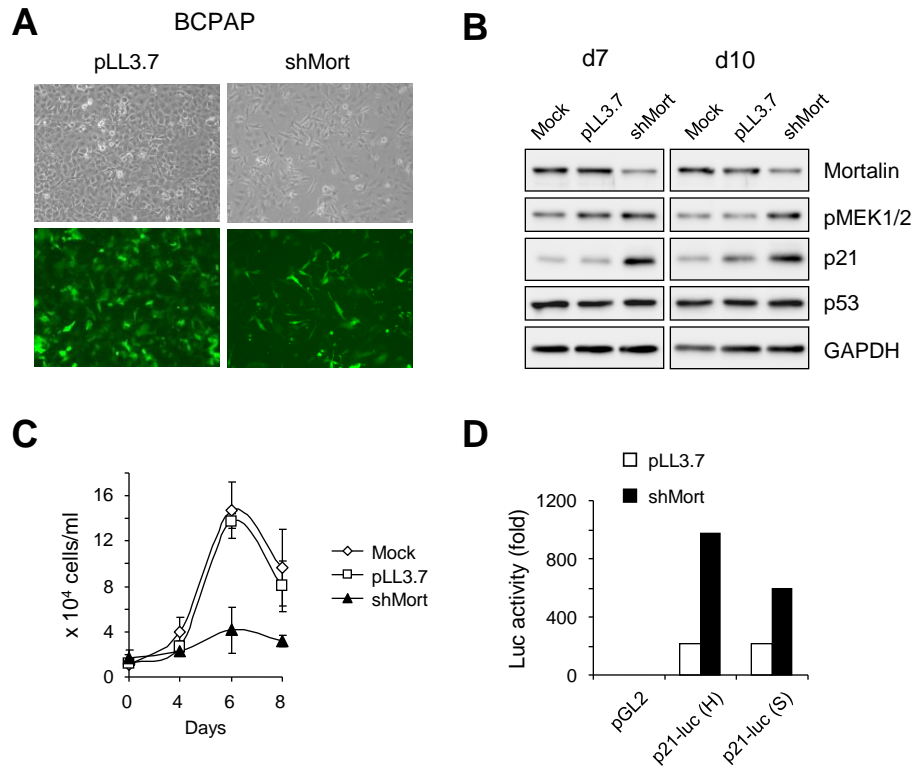

**Figure S5. Mortalin knockdown induces growth inhibition in B-Raf<sup>V600E</sup>-transformed thyroid cancer line, BCPAP.** (A) BCPAP cells were infected with shMort#1 and its control empty pLL3.7 virus. GFP expression indicates infection efficiency (lower panels). (B) Cells infected for 7 and 10 days were examined for expression of the indicated proteins by Western blot analysis. (C) Proliferation rates were monitored by cell counting. Data (mean  $\pm$  SEM) are from a representative experiment performed in triplicate. (D) Cells were co-transfected for 3 days with shMort#1 and the p21-luciferase reporters, H2320 and S2260, before determining luciferase activity. pGL2 is the control luciferase reporter vector. Data (mean  $\pm$  SEM) from a representative experiment performed in triplicate are expressed as fold changes relative to the cells co-transfected with pGL2 and pLL3.7.

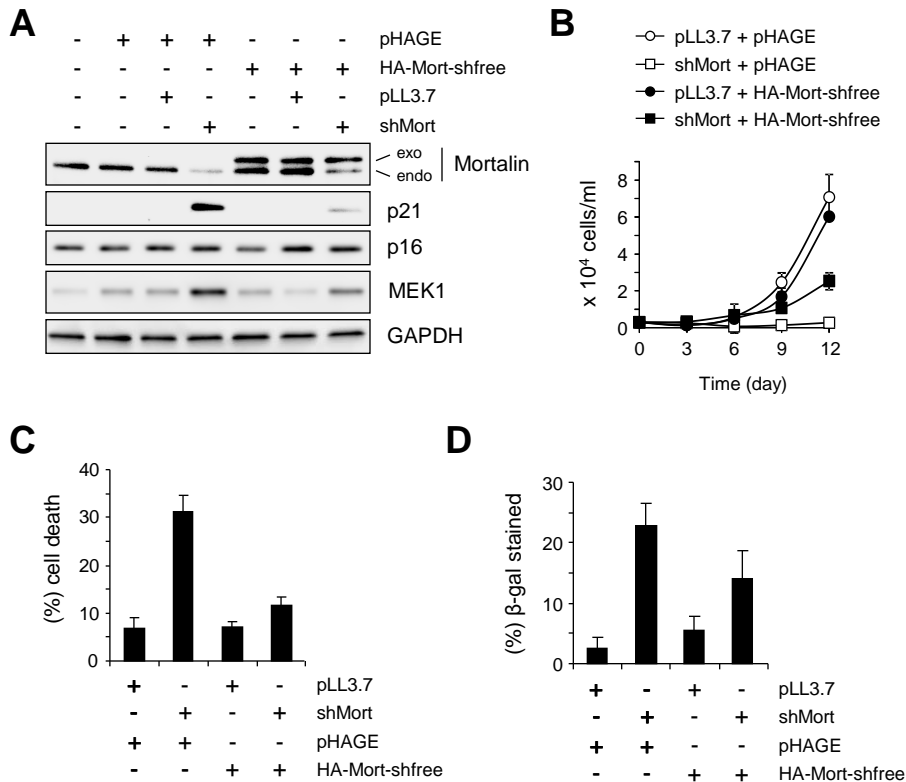

**Figure S6. Expression of non-shRNA-targetable mortalin abrogates mortalin knockdown effects.** SK-MEL-28 cells were co-infected with shMort#1 virus and the lentivirus expressing non-shMort-targetable mortalin tagged with HA at the N-terminus (HA-Mort-shfree). The empty viruses, pHAGE and pLL3.7, are the controls for HA-Mort-shfree and shMort viruses, respectively. Cells were examined for expression of the indicated proteins by Western blotting at post-infection day 5 (**A**), proliferation rates by cell counting (**B**), cell death by trypan blue staining at post-infection day 5 (**C**), and SA  $\beta$ -gal staining at post-infection day 10 (**D**). *P* value is  $< 0.05$  for the shMort/Mort-shfree pair compared to the control shMort/pHAGE pair in (B, day 12), (C), and (D), respectively (Student's *t* test). Data (mean  $\pm$  SEM) are from a representative experiment performed in triplicate.

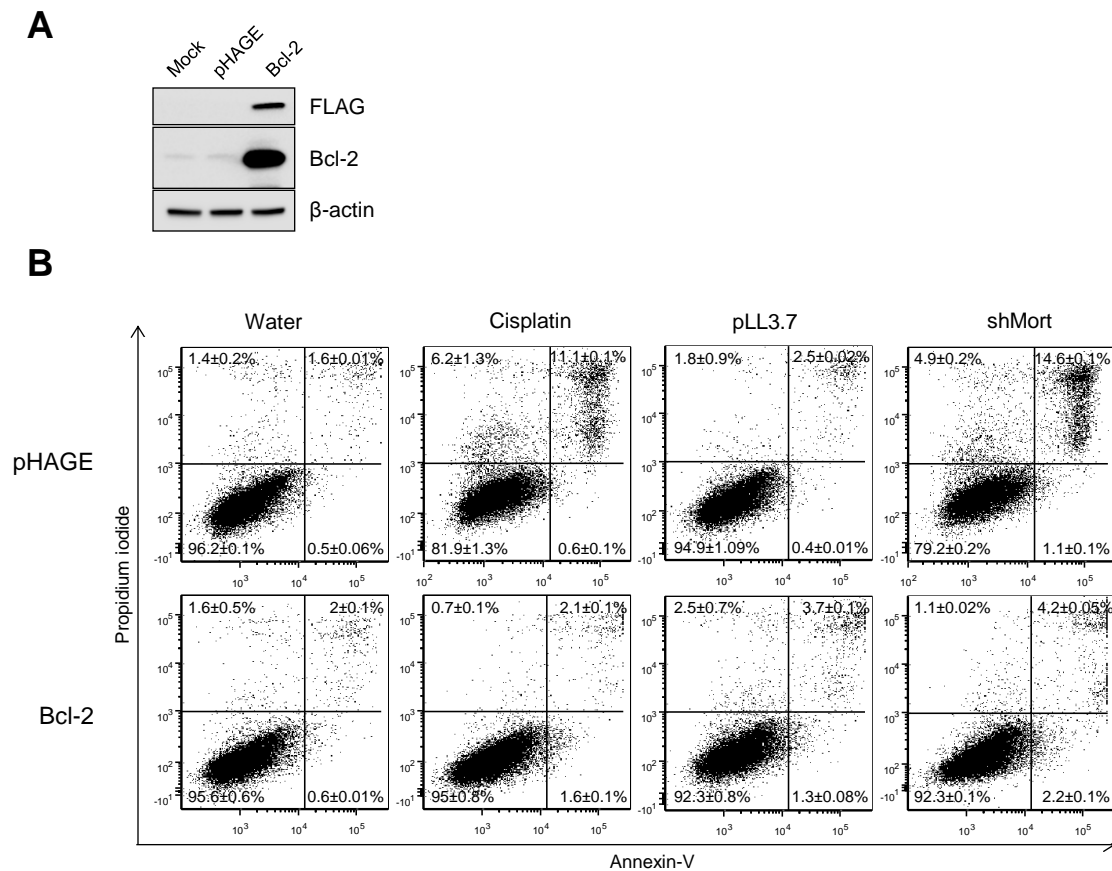

**Figure S7. Bcl-2 overexpression renders HCT116 p21<sup>-/-</sup> cells resistant to cell death induced by cisplatin or mortalin knockdown.** (A) HCT116 p21<sup>-/-</sup> cells were infected with lentiviral pHAGE-puro-FLAG-Bcl-2. Western blotting confirms expression of the exogenous Bcl-2. (B) Cells in (A) were treated with 50  $\mu$ M cisplatin for 24h or were infected with lentiviral shMort for 4 days before the annexin V assay. Cisplatin was dissolved in water. (%) population of annexin V stained cells are scored in Fig. 4E.

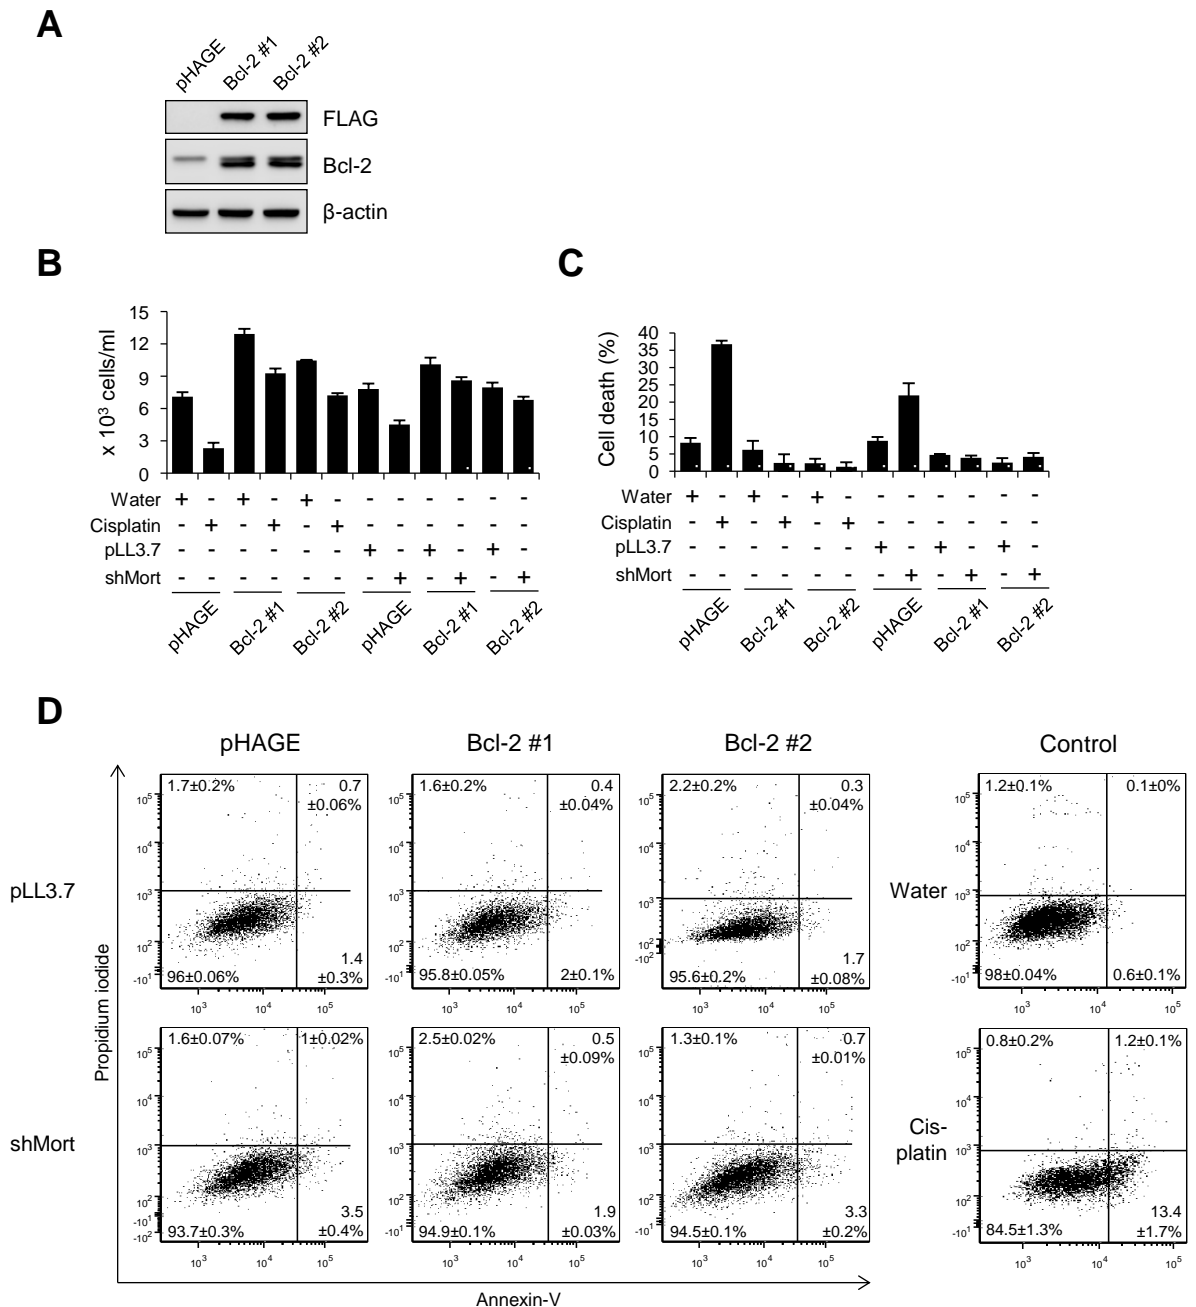

**Figure S8. Bcl-2 overexpression renders SK-MEL-28 cells resistant to cell death induced by cisplatin or mortalin knockdown.** (A) SK-MEL-28 cells were infected with lentiviral pHAGE-puro-FLAG-Bcl-2. Two independent SK-MEL-28 cells stably expressing FLAG-Bcl-2 were derived by puromycin selection. Western blotting confirms expression of the exogenous Bcl-2. (B and C) Cells in (A) were treated with 50  $\mu$ M cisplatin for 24h (control for apoptosis induction) or were infected with lentiviral shMort for 4 days before counting live (B) and dead (C) cells using trypan blue. Cisplatin was dissolved in water. (D) shMort-infected cells in (B and C) were examined by the annexin V assay. Note that mortalin knockdown does not efficiently increase annexin V staining.



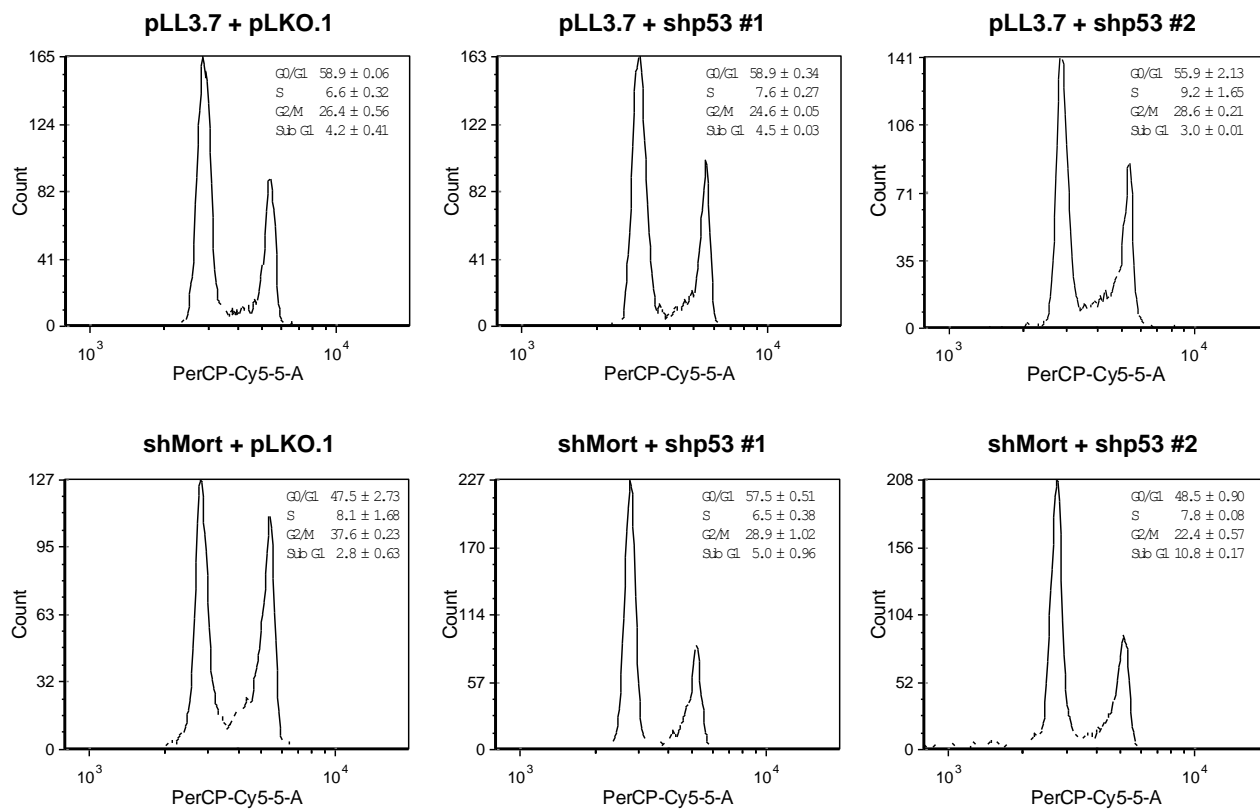

**Figure S9. p53 knockdown abrogates G2/M arrest induced by mortalin knockdown in SK-MEL-1 cells.** SK-MEL-1 cells were co-infected for 5 days with lentiviral shMort #1 and pLKO.1 expressing two different p53-targeting shRNAs (shp53 #1 and shp53 #2). pLKO.1 and pLL3.7 are controls for shp53 and shMort, respectively. Data (mean  $\pm$  SEM) are from a representative experiment performed in triplicate.

**Table S1. MAPK pathway and *TP53* status in test lines<sup>1</sup>**

| Cell line (tumor type)    | MAPK pathway alteration | <i>TP53</i>                    |
|---------------------------|-------------------------|--------------------------------|
| SK-MEL-1 (mel)            | B-RafV600E (hetero)     | WT                             |
| SK-MEL-28 (mel)           | B-RafV600E (homo)       | L145R (homo)                   |
| A375 (mel)                | B-RafV600E (homo)       | WT                             |
| RPMI-7951 (mel)           | B-RafV600E (hetero)     | S166* (homo)                   |
| SK-MEL-2 (mel)            | N-RasQ61R (homo)        | G245S (hetero)                 |
| MeWo (mel)                | NF1Q1336* (homo)        | E258K (hetero), Q317* (hetero) |
| 8505C (PTC)               | B-RafV600E (hetero)     | R248G (homo)                   |
| BCPAP (PTC)               | B-RafV600E (homo)       | D259Y (homo)                   |
| HT29 (colon)              | B-RafV600E (hetero)     | R273H (homo)                   |
| HCT116 (colon)            | K-RasG13D (homo)        | WT                             |
| HCT116 p21 <sup>-/-</sup> | K-RasG13D (homo)        | WT                             |

<sup>1</sup>Information collected from the Cancer Genome Project at Sanger Institute (<http://www.sanger.ac.uk/>)

\*non-sense mutation

Abbreviations: mel, melanoma; PTC, papillary thyroid cancer; het, heterozygous mutation; homo, homozygous mutation

**Table S2. Primers used for generation of the gene expression constructs**

| Constructs                      |         | Sequences                                       |
|---------------------------------|---------|-------------------------------------------------|
| pHAGE-HA-Mort                   | Foward  | TTATCCGCTAGCATAAGTGCCAGCCGAGCTGCAGCA<br>GCCCG   |
|                                 | Reverse | TTTCTGGGATCCTTACTGTTTTTCCTCCTTTTGATCTT<br>CC    |
| pHAGE-HA-Mort-<br>shfree        | Foward  | CATTGGCCGGCGATACGACGACCCAGAAGTACAGAA<br>AGAC    |
|                                 | Reverse | GTCTTTCTGTACTTCTGGGTCGTCTATCGCCGGCCA<br>ATG     |
| pHAGE-HA-HSC70                  | Foward  | CCAGCAGCTAGCTCCAAGGGACCTGCAGTTGGTATT<br>GATCTTG |
|                                 | Reverse | CACTTGGGATCCTTAATCAACCTCTTCAATGGTGGGC<br>CCTGAG |
| pHAGE-HA-BIP                    | Foward  | GCTGGCGCTAGCAAGCTCTCCCTGGTGGCCGCGATG<br>CTGCTG  |
|                                 | Reverse | GCAGATGGATCCCTACAACCTCATCTTTTTCTGCTGTAT<br>CCTC |
| pHAGE-HA-HSP72                  | Foward  | GGAACCGCTAGCGCCAAAGCCGCGGCGATCGGCATC<br>GACCTG  |
|                                 | Reverse | TTGGAAGGATCCCTAATCTACCTCCTCAATGGTGGGG<br>CCTGA  |
| pHAGE-ERK1-<br>K71R/T202A/Y204F | Foward  | CACACCGGCTTCCTGGCGGAGTTTGTGGCTACGCGC<br>TGG     |
|                                 | Reverse | GTGTGGCCGAAGGACCGCCTCAAACACCGATGCGCG<br>ACC     |

**Table S3. Primers used for qPCR**

| Targets                       |         | Sequences                |
|-------------------------------|---------|--------------------------|
| p21 <sup>CIP1</sup> (526–844) | Foward  | CTGGAGACTCTCAGGGTCGAA    |
|                               | Reverse | CCAGCACTCTTAGGAACCTCTCA  |
| MEK1 (574-885)                | Foward  | CAGAAGAAGCTGGAGGAGCTAG   |
|                               | Reverse | CCATCGCTGTAGAACGCACCAT   |
| MEK2 (343-658)                | Foward  | CGAGGCAAACCTGGTGGACCT    |
|                               | Reverse | CCGTAGAAGCCCACGATGTAC    |
| Actin (1,543-1,731)           | Foward  | GTCCTCTCCCAAGTCCACAC     |
|                               | Reverse | GGGAGACCAAAGCCTTCAT      |
| GAPDH (191-498)               | Foward  | CGGAGTCAACGGATTTGGTCGTAT |
|                               | Reverse | AGCCTTCTCCATGGTGGTGAAGAC |
